# Supplementary material for: Inhibition of AKT induces p53/SIRT6/PARP1-dependent parthanatos to suppress tumor growth
Source: PubMed Central journal article supplement (PMC9205131; doi:10.1186/s12964-022-00897-1), 2022-06-17

# Supplemental Figure 4

## A

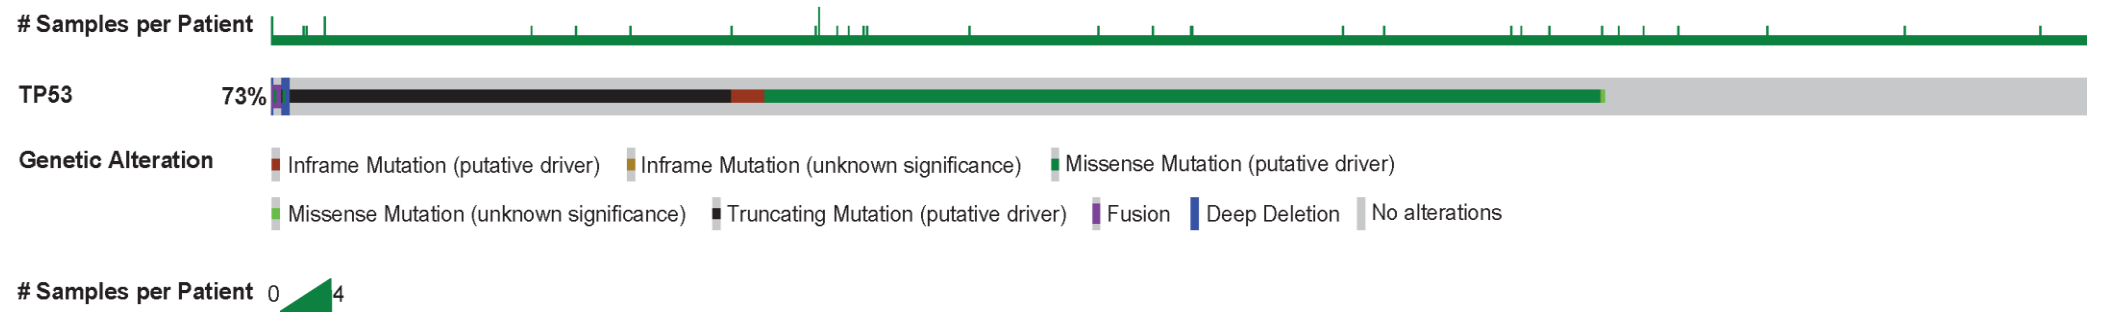

## B

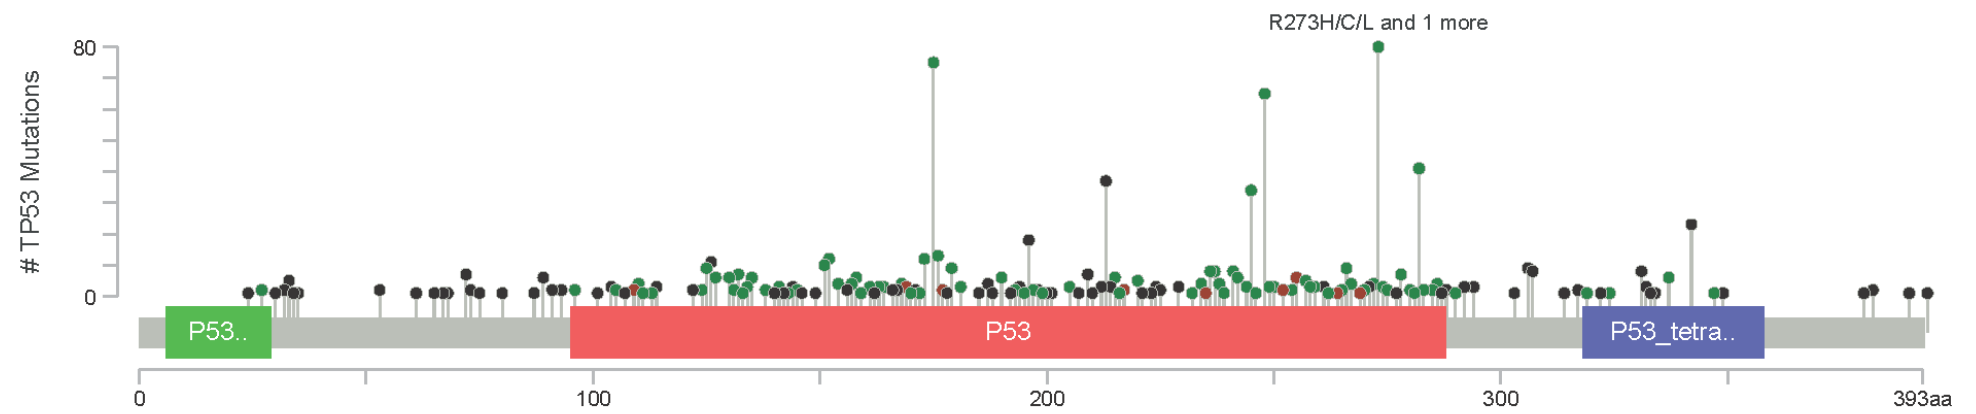

## C

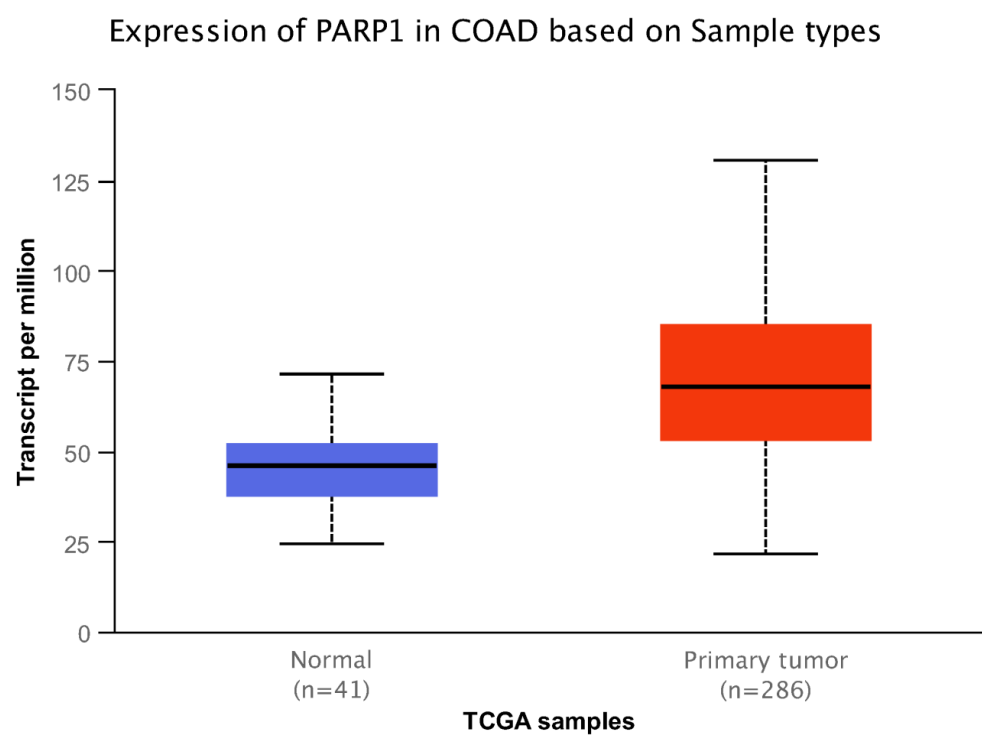

## D

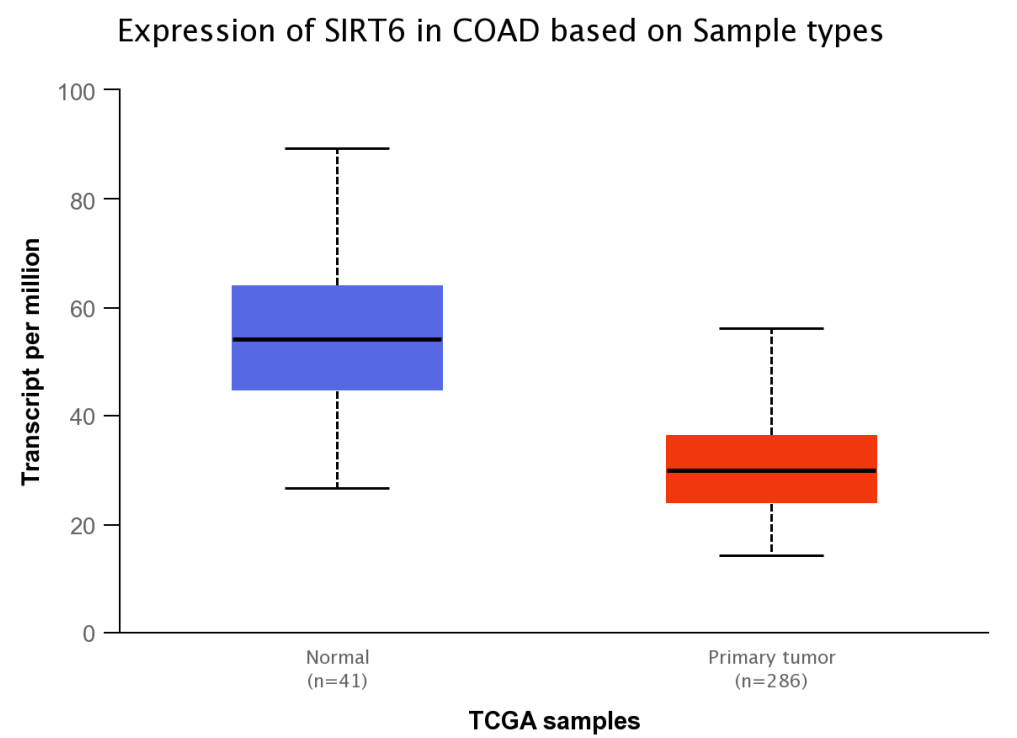

Supplement: 12964_2022_897_MOESM5_ESM.pdf [file 12964_2022_897_MOESM5_ESM.pdf]
